# Supplementary material for: Intermolecular interactions in dictating the self-assembly of halogen derivatives of bis-(N-substituted oxamato)palladate(ii) complexes
Source: Royal Society of Chemistry journal article supplement (doi:10.1039/c5ra25136b), 2016-01-01
Supplement: c5ra25136b1.pdf [file c5ra25136b1.pdf]

**Electronic Supplementary Information (ESI)**

**Intermolecular interactions in dictating the self-assembly of halogen derivatives of bis-(*N*-substituted oxamato)palladate(II) complexes**

Francisco Ramón Fortea-Pérez,<sup>†</sup> Nadia Marico,<sup>‡</sup> Giovanni De Munno,<sup>‡</sup> Donatella Armentano,<sup>‡,\*</sup> Miguel Julve,<sup>†</sup> Salah-Eddine Stiriba<sup>†,¶,\*</sup>

<sup>†</sup> *Instituto de Ciencia Molecular (ICMol), Universitat de València, C/ Catedrático José Beltrán 2, 46980 Paterna, València, Spain*

<sup>‡</sup> *Dipartimento di Chimica e Tecnologie Chimiche (CTC), Università della Calabria, 87036 Rende, Cosenza, Italy.*

<sup>¶</sup> *Equipe de Chimie Moléculaire, Matériaux et Modélisation- C3M, Faculté Polydisciplinaire de Safi, Université Cadi Ayyad, Safi, Morocco.*

Table S1. Crystal Data and Data Collection Parameters for **1-3**

|                                                                 | <b>1</b>                                                                        | <b>2</b>                                                                          | <b>3</b>                                                                          |
|-----------------------------------------------------------------|---------------------------------------------------------------------------------|-----------------------------------------------------------------------------------|-----------------------------------------------------------------------------------|
| Formula                                                         | C <sub>48</sub> H <sub>80</sub> N <sub>4</sub> O <sub>6</sub> F <sub>2</sub> Pd | C <sub>48</sub> H <sub>88</sub> N <sub>4</sub> O <sub>10</sub> Cl <sub>2</sub> Pd | C <sub>48</sub> H <sub>88</sub> N <sub>4</sub> O <sub>10</sub> Br <sub>2</sub> Pd |
| <i>Mr</i>                                                       | 953.56                                                                          | 1058.52                                                                           | 1147.44                                                                           |
| Crystal                                                         | Monoclinic                                                                      | Triclinic                                                                         | Monoclinic                                                                        |
| Space                                                           | <i>P2</i> <sub>1/c</sub>                                                        | <i>P</i> -1                                                                       | <i>P2</i> <sub>1/c</sub>                                                          |
| <i>a</i> / Å                                                    | 9.6448(7)                                                                       | 12.5224(9)                                                                        | 14.827(4)                                                                         |
| <i>b</i> / Å                                                    | 16.3141(12)                                                                     | 15.6996(11)                                                                       | 14.635(4)                                                                         |
| <i>c</i> / Å                                                    | 16.9067(13)                                                                     | 17.1433(13)                                                                       | 15.017(4)                                                                         |
| $\alpha$ / °                                                    | 90                                                                              | 65.551(3)                                                                         | 90                                                                                |
| $\beta$ / °                                                     | 92.808(3)                                                                       | 69.815(4)                                                                         | 114.983(9)                                                                        |
| $\gamma$ / °                                                    | 90                                                                              | 82.697(4)                                                                         | 90                                                                                |
| <i>V</i> / Å <sup>3</sup>                                       | 2657.0(3)                                                                       | 2830.8(4)                                                                         | 2953.8(13)                                                                        |
| <i>Z</i>                                                        | 2                                                                               | 2                                                                                 | 2                                                                                 |
| <i>D<sub>c</sub></i> / g cm <sup>-3</sup>                       | 1.192                                                                           | 1.242                                                                             | 1.290                                                                             |
| <i>T</i> / K                                                    | 293(2)                                                                          | 293(2)                                                                            | 293                                                                               |
| $\mu$ / mm <sup>-1</sup>                                        | 0.402                                                                           | 0.475                                                                             | 1.718                                                                             |
| <i>F</i> (000)                                                  | 1016                                                                            | 11128                                                                             | 1200                                                                              |
| Reflections collected                                           | 34933                                                                           | 54404                                                                             | 27339                                                                             |
| Independent reflections                                         | 5622<br>[ <i>R</i> (int) = 0.0507]                                              | 11951<br>[ <i>R</i> (int) = 0.0600]                                               | 5573<br>[ <i>R</i> (int) = 0.0615]                                                |
| Data/restraints/parameters                                      | 5622/190 /281                                                                   | 11951/0/597                                                                       | 5573/242/309                                                                      |
| Goodness-of-fit on <i>F</i> <sup>2</sup>                        | 1.094                                                                           | 1.000                                                                             | 1.045                                                                             |
| Final <i>R</i> indices<br>[ <i>I</i> > 2 $\sigma$ ( <i>I</i> )] | <i>R</i> <sub>1</sub> = 0.0294,<br><i>wR</i> <sub>2</sub> = 0.0855              | <i>R</i> <sub>1</sub> = 0.0583,<br><i>wR</i> <sub>2</sub> = 0.1630                | <i>R</i> <sub>1</sub> = 0.0433,<br><i>wR</i> <sub>2</sub> = 0.1189                |
| <i>R</i> indices (all data)                                     | <i>R</i> <sub>1</sub> = 0.0422,<br><i>wR</i> <sub>2</sub> = 0.1008              | <i>R</i> <sub>1</sub> = 0.0840,<br><i>wR</i> <sub>2</sub> = 0.1878                | <i>R</i> <sub>1</sub> = 0.0554,<br><i>wR</i> <sub>2</sub> = 0.1276                |
| Largest diff. peak and hole / e Å <sup>-3</sup>                 | 0.390 and -0.570                                                                | 0.947 and -0.438                                                                  | 0.867 and -0.927                                                                  |

**Table S2.** Selected bond lengths (Å) and angles (deg) for **1**\*

---

|                  |                  |
|------------------|------------------|
| Pd(1)-O(1)       | Pd(1)-N(1)       |
| O(1)-Pd(1)-O(1a) | O(1a)-Pd(1)-N(1) |
| O(1)-Pd(1)-N(1)  |                  |

\*Symmetry transformations used to generate equivalent atoms:

(a) =  $-x+1, -y+1, -z$ .

**Table S3.** Selected bond lengths (Å) and angles (deg) for **2**\*

---

|                  |                  |
|------------------|------------------|
| Pd(1)-O(1)       | O(4)-Pd(2)       |
| Pd(1)-N(1)       | N(2)-Pd(2)       |
| O(1a)-Pd(1)-O(1) | O(4b)-Pd(2)-N(2) |
| O(1)-Pd(1)-N(1a) | O(4)-Pd(2)-N(2)  |
| O(1)-Pd(1)-N(1)  | O(4)-Pd(2)-N(2b) |
| N(1a)-Pd(1)-N(1) | N(2)-Pd(2)-N(2b) |
| O(4b)-Pd(2)-O(4) |                  |

\*Symmetry transformations used to generate equivalent atoms:

(a) =  $-x+2, -y, -z+1$ . (b) =  $-x+2, -y, -z+2$ .

**Table S4.** Selected bond lengths (Å) and angles (deg) for **3**\*

---

|                  |                  |
|------------------|------------------|
| Pd(1)-O(1)       | Pd(1)-N(1)       |
| O(1a)-Pd(1)-O(1) | O(1)-Pd(1)-N(1)  |
| O(1a)-Pd(1)-N(1) | N(1)-Pd(1)-N(1a) |

\*Symmetry transformations used to generate equivalent atoms:

(a) =  $-x+1, y, -z+1/2$ .

**Table S5.** Hydrogen bonds lengths (Å) for **2**\*

|               |          |                |          |
|---------------|----------|----------------|----------|
| O(1W)···O(3)  | 2.853(4) | O(2W)···O(2)   | 2.915(4) |
| O(1W)···O(3c) | 2.900(4) | O(2W)···O(3W)  | 2.782(4) |
| O(1W)···O(2W) | 2.660(4) | O(3W)···O(3Wd) | 2.817(4) |

\*Symmetry transformations used to generate equivalent atoms:  
(c) = 1-x, -y, 1-z; (d) = 1-x, 1-y, 1-z.

**Table S6.** Hydrogen bonds lengths (Å) for **3**\*

|                |          |               |          |
|----------------|----------|---------------|----------|
| O(1W)···O(2)   | 2.840(4) | O(1W)···O(2W) | 2.859(4) |
| O(1W)···O(1Wb) | 2.893(4) | O(2W)···O(3)  | 2.817(4) |
| O(2W)···O(2Wb) | 2.840(4) |               |          |

\*Symmetry transformations used to generate equivalent atoms:  
(b) = -x, y, -z+1/2.
